# Supplementary material
Source: PubMed Central journal article supplement (PMC2634731)

# Supp Figure 2

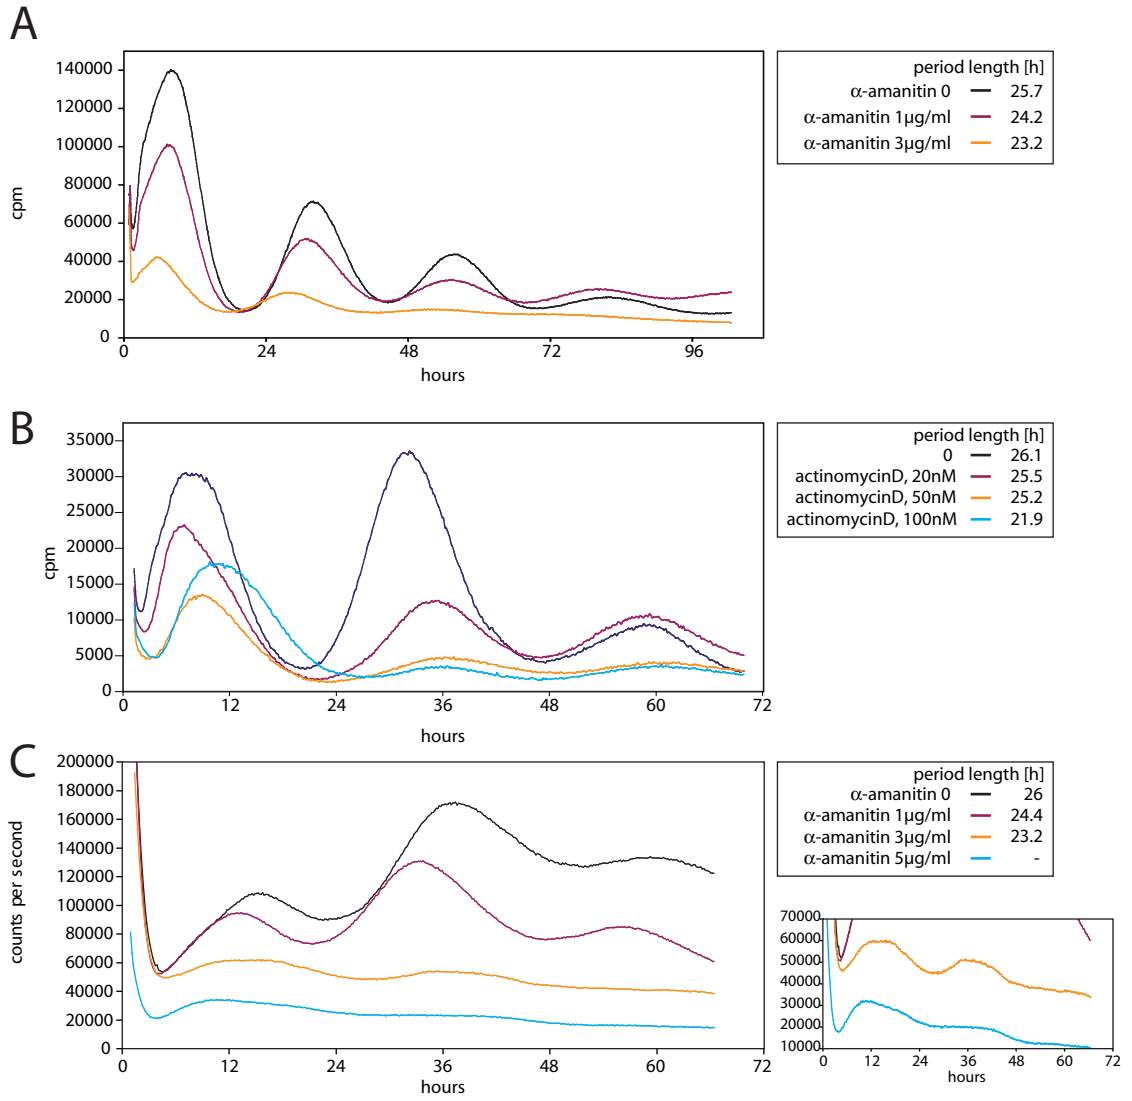

Supplement: emboj2008262s5.pdf [file emboj2008262s5.pdf]
